# Supplementary material for: Long-Term Diversity and Genome Adaptation of Acinetobacter baylyi in a Minimal-Medium Chemostat
Source: PubMed Central journal article supplement — Genome Biol Evol. 2012 Dec 18;5(1):87–97. doi: 10.1093/gbe/evs120 (PMC3595037; doi:10.1093/gbe/evs120), 2012-12-18
Supplement: supp_evs120_THOMEN_SUP_DATA.pdf [file supp_evs120_THOMEN_SUP_DATA.pdf]

## Supplementary Data

### 1. Genome resequencing of ancestral strain ABWT and comparison with ADP1 strain

The genome of ABWT was resequenced and showed significant differences with *Acinetobacter baylyi* ADP1. These differences are summarized in table S1. A sequence of about 40 kb was present in ABWT but absent in ADP1. ORF were searched using ORF Finder on line tool and ORFs were blasted. The results are summarized in the table S2.

**Table S1. Mutational event in ABWT when compared to *A. baylyi* ADP1**

| Index ADP1      | Event       | Comment                                                                                                               |
|-----------------|-------------|-----------------------------------------------------------------------------------------------------------------------|
| 178468          | G → –       | 74 bp upstream start codon of ACIAD0178 atpI ATP synthase protein I                                                   |
| 289081          | insertion   | Insertion of IS1236 between ACIAD 0290 and ACIAD 0291                                                                 |
| 321573-322809   | deletion    | Deletion of IS1236_1                                                                                                  |
| 364108          | G → A       | L → F; ACIAD0371 pH adaptation potassium efflux system protein G                                                      |
| 943621-944857   | deletion    | Deletion of IS1236_3                                                                                                  |
| 968073          | T → C       | 500 bp upstream start codon of ACIAD0980 vanA (vanillate O-demethylase oxygenase subunit)                             |
| 1139725         | – → A       | 75 bp upstream start codon of ACIAD1147 putative APC family, S-methylmethionine transporter                           |
| 1179108         | C → T       | D → N; ACIAD1182 phrB deoxyribodipyrimidine photolyase (photoreactivation), FAD-binding                               |
| 1277087         | T → –       | ACIAD1276 putative amino acid transporter; the frameshift results in a stop codon about 100bp downstream the deletion |
| 1278182         | T → –       | ACIAD1277; the frameshift results in a stop codon about 100bp downstream the deletion                                 |
| 1444653         | T → G       | 62bp upstream start codon of ACIAD1446 catB (muconate cycloisomerase I)                                               |
| 1468567         | C → T       | S → L; ACIAD1471 putative transmembrane sensor protein (iron transport)                                               |
| 1648116         | C → T       | 157 bp upstream codon start ACIAD1649 putP (SSS family, major sodium/proline symporter)                               |
| 1794961-1795034 |             | Putative duplication and putative divergence of the copy                                                              |
| 1803858-1803939 | Duplication | ACIAD1795                                                                                                             |
| 2045478         | A → C       | 69 bp upstream start codon of ACIAD2059 gltJ glutamate/aspartate transport protein (membrane)                         |
| 2420279         | – → C       | 56 bp upstream start codon of ACIAD2457 putative membrane protein                                                     |
| 2542652         | G → A       | Silent mutation in ACIAD2584 lepA GTP binding protein                                                                 |
| 2737671-2737674 |             | Putative duplication and putative divergence of the copy                                                              |
| 2745958-2749970 |             | Putative duplication and putative divergence of the copy                                                              |
| 2765010         | A → C       | S → R; ACIAD2827 putative periplasmic binding protein of transport/transglycosylase                                   |
| 2803531-2805196 |             | Putative duplication and putative divergence of the copy                                                              |
| 2876467         | C → T       | S → L; ACIAD2944 putative resistance-nodulation-cell division (RND) family (AdeB-like)                                |
| 3357842         | G → A       | 237 bp upstream start codon ACIAD3437                                                                                 |
| 3392500         | C → T       | A → V; ACIAD3465 putative 2-component sensor                                                                          |

**Table S2. Annotation of a sequence of ABWT absent in ADP1.**

| index       | frame | size | product                                       | organism                                 |
|-------------|-------|------|-----------------------------------------------|------------------------------------------|
| 222-1523    | +3    | 1301 | Phage integrase                               | <i>Acinetobacter radioresistens SK82</i> |
| 315-1544    | -3    | 1229 | Mutator family transposase                    | <i>Acinetobacter johnsonii</i>           |
| 3127-3933   | -1    | 806  | AraC family transcriptional regulator         | <i>Pantoea sp. SL1-M5</i>                |
|             |       |      |                                               | <i>Klebsiella pneumoniae 342</i>         |
| 6405-7790   | +3    | 1385 | Citrate transporter                           | <i>Acinetobacter junii SH205</i>         |
|             |       |      |                                               | <i>Acinetobacter baylyi ADP1</i>         |
| 6612-7598   | -3    | 986  | NmrA family protein                           | <i>Klebsiella oxytoca</i>                |
| 7854-8795   | +3    | 941  | GntR family transcriptional regulator         | <i>Pseudomonas syringae Cit7</i>         |
| 9022-10089  | -1    | 1067 | Luciferase family protein                     | <i>Shingobacterium spiritivorum</i>      |
| 9120-10520  | +3    | 1400 | amidohydrolase                                | <i>Pantoea stewartii</i>                 |
|             |       |      |                                               | <i>Klebsiella pneumoniae</i>             |
| 10123-10974 | -1    | 851  | Hypothetical protein                          | <i>Leeuwenhoekia blandensis</i>          |
| 11025-11975 | +3    | 950  | SMP30/ gluconolactonase/LRE family            | <i>Pantoea sp.</i>                       |
|             |       |      |                                               | <i>Klebsiella pneumoniae</i>             |
| 13381-14685 | -1    | 304  | CaiB/BaiF family class III CoA transferase    | <i>Alcaligenes faecalis</i>              |
| 14686-15594 | -1    | 908  | Enoyl-CoA hydratase family                    | <i>Alcaligenes faecalis</i>              |
| 16004-17734 | -2    | 1730 | SSS sodium solute transporter superfamily     | <i>Acidovorax delafieldii 2AN</i>        |
| 17532-18314 | +3    | 782  | IcIR family transcriptional regulator         | <i>Acinetobacter sp. P8-3-8</i>          |
| 18410-19591 | -2    | 1181 | Iron-containing alcohol dehydrogenase         | <i>Acinetobacter johnsonii</i>           |
| 19663-21198 | -1    | 1535 | Methylmalonate-semialdehyde dehydrogenase     | <i>Acinetobacter johnsonii SH046</i>     |
| 22280-22942 | -2    | 662  | Regulatory protein, TetR                      | <i>Acinetobacter radioresistens SK82</i> |
| 23012-24001 | -2    | 989  | Putative dehydrogenase                        | <i>Acinetobacter baumannii AYE</i>       |
| 25238-26212 | -2    | 974  | Oxidoreductase                                | <i>Klebsiella pneumoniae 342</i>         |
| 27212-28432 | +2    | 1220 | Dimethyl sulfoniopropionate lyase             | <i>Alcaligenes faecalis</i>              |
| 30925-31845 | +1    | 920  | Transcriptional regulator                     | <i>Acinetobacter calcoaceticus</i>       |
| 33303-35948 | -3    | 2645 | Aconitate hydratase                           | <i>Pseudomonas syringae Cit7</i>         |
| 34143-34754 | +3    | 611  | Modulator of drug activity B                  | <i>Shewanella sp. HN-41</i>              |
| 34980-35621 | +3    | 641  | TetR family transcriptional regulator         | <i>Serratia odorifera</i>                |
|             |       |      |                                               | <i>Klebsiella pneumoniae</i>             |
| 35942-37114 | -2    | 1172 | AcnD accessory protein PrpF                   | <i>Pseudomonas syringae</i>              |
| 36415-37725 | +1    | 1310 | Transporter (MFS family)                      | <i>Klebsiella pneumoniae 342</i>         |
| 37115-37870 | -2    | 755  | Extracellular solute-binding protein family 3 | <i>Pseudomonas syringae Cit7</i>         |

## 2. Identification of mutational events and building of the tree

All mutations were identified by analysis of the genome resequencings with standard tools (cited in text) except the duplication (ACIAD1848 – ACIAD1861), and the insertion loci for branches B3, B4 and B5.

Duplication was identified by the difference in coverage for this region; as a result the duplication is present in all genome resequencing (endpoint clones, and population sampled at 1900, 2300 and 2800<sup>th</sup> generation) but absent in ABwt.

The insertion loci for branches B3, B4 and B5 were identified as now described: in the fasta files provided by resequencing of sampled populations, we looked for fragments carrying the beginning sequence and the end sequence of IS1236. We identified all joint sequences, allowing to discover new ones. We blasted them on *Acinetobacter baylyi* ADP1 to find out the insertion loci corresponding to B3, B4 and B5. The insertion of another IS was located in a region different from ADP1 strain (see 1). To estimate the ratio of sub populations, we compared for each locus, the

number of fragments founded in fasta files matching with IS insertion with the number of fragments matching with no insertion (wild type profile). For the five branches (B1, B2, B3, B4 and B5), the sum of the ratios is about 100% for the three sequencing of population, justifying that there are no other relevant insertion loci, and that each bacteria underwent only one of such five insertion events.

#### How we obtained the data in table S3:

From frozen samples of population, some bacteria were plated and allowed to grow overnight; single colonies were piked and allowed to grow overnight in LB, snap-frozen and stored at -70°C. To extract genomic DNA, bacteria issued from a single colony were grown overnight in LB, centrifuged and resuspended in small volume of Tris EDTA. The samples were then heated at 100°C during 10 minutes; lysed cells were centrifuged, the supernatant recovered, aliquoted and stored at -20°C.

To check the presence of point mutations and small indels (glnK, Ins 9bp, ACIAD1029,  $\Delta$ 8bp, C1903816T, ACIAD1931, ACIAD2054, and qseB in table S3), primers were designed to amplify fragments of about 800 bp (point mutation or indels in the middle of the fragment). The PCR products were purified on electrophoresis gel and sequenced by Eurofin-MWG.

The presence of IS1236 (1236 bp) at two loci (branches B1 and B2) were checked by amplifying each region and PCR product sizes were checked on electrophoresis gel.

To check the large deletion  $\Delta$ 60kb two different PCR were performed per genome: one PCR with sense primer upstream the deleted sequence and antisense primer within the deleted sequence, and one PCR with antisense primer downstream the deleted region. Only one PCR gives a product which could be checked on electrophoresis gel.

To check the large deletion  $\Delta$ gltI, one PCR were performed per genome with sense primer upstream the deleted sequence and antisense primer downstream the deleted region. PCR product sizes were checked on electrophoresis gel.

To check the inversion, two different PCRs were performed per genome: the same sense primer were used for both PCRs, and two different antisense primers hybridizing in the inverted sequence were used, one giving product only in the case of an inverted sequence and the other giving product only in the case of a no-inverted sequence. The products were checked on electrophoresis gel.

#### **Table S3. Detection of mutations in several isolated clones<sup>1</sup>.**

---

<sup>1</sup> In ABWT, an IS1236 copy is present in ACIAD0290. The transposition of this IS (event “ACIAD0290 Ins 9bp”) results in an insertion of 9 bp in ACIAD0290 when compared to ADP1.

|         | glnK   | ACIAD0290 | citA   | ACIAD1029 | IS-B1   | IS-B2   | Δ8bp    | C1903816T | ACIAD1931 | Inversion | ACIAD2054 | ΔgltI   | Δ60kb   | qseB    |
|---------|--------|-----------|--------|-----------|---------|---------|---------|-----------|-----------|-----------|-----------|---------|---------|---------|
|         | 244223 | 289081    | 389458 | 1020409   | 1230681 | 1231207 | 1249430 | 1903816   | 1920605   | 2041592   | 2042174   | 2046132 | 2664637 | 2891803 |
|         | C → T  | Ins 9bp   | T → C  | T → C     |         |         |         |           | Ins A     |           | T → C     |         |         | G → A   |
| AB85a   | no     |           | no     |           |         |         | yes     | no        |           | no        |           |         | yes     | no      |
| AB85b   |        |           |        |           |         |         | yes     |           |           |           |           |         |         |         |
| AB85c   |        |           |        |           |         |         | yes     |           |           |           |           |         |         |         |
| AB85d   |        |           |        |           |         |         | yes     |           |           |           |           |         |         |         |
| AB85e   |        |           |        |           |         |         |         |           |           |           |           |         | yes     |         |
| AB85f   |        |           |        |           |         |         |         |           |           |           |           |         | yes     |         |
| AB215a  | no     |           | no     |           | no      |         | yes     | no        |           | yes       |           |         | yes     | yes     |
| AB215b  |        |           |        |           | no      |         |         |           |           | yes       |           |         |         |         |
| AB215c  |        |           |        |           | no      |         |         |           |           | yes       |           |         |         |         |
| AB215d  |        |           |        |           | no      |         |         |           |           | yes       |           |         |         |         |
| AB360d  | no     |           | no     |           |         |         |         | no        |           | yes       |           |         | yes     | yes     |
| AB360f  | no     |           | no     |           |         |         |         | no        |           | yes       |           |         | yes     | yes     |
| AB590a  |        | no        |        |           | no      |         |         | no        |           |           | no        |         |         |         |
| AB590b  |        |           |        |           | no      |         |         | no        |           |           |           |         |         |         |
| AB590c  |        | no        |        |           | no      |         | yes     | yes       |           |           | no        | no      |         |         |
| AB590d  |        |           |        |           | no      |         |         | no        |           |           |           |         |         |         |
| AB590e  |        |           |        |           | no      |         |         | no        |           |           |           |         |         |         |
| AB590f  |        |           |        |           | no      |         |         | no        |           |           |           |         |         |         |
| AB590g  |        |           |        |           | no      |         |         | no        |           |           |           |         |         |         |
| AB590h  |        |           |        |           | no      |         |         | no        |           |           |           |         |         |         |
| AB590i  |        |           |        |           | no      |         |         | no        |           |           |           |         |         |         |
| AB590k  |        |           |        |           | no      |         |         | no        |           |           |           |         |         |         |
| AB845a  | no     |           | no     |           | no      |         | yes     | G1903844A |           | yes       |           |         | yes     | yes     |
| AB845b  | no     |           | no     |           | no      |         |         | G1903797A |           |           |           |         |         |         |
| AB845c  |        |           |        |           | no      |         |         | G1903797A |           |           |           |         |         |         |
| AB845d  |        |           |        |           | no      |         |         | G1903844A |           |           |           |         |         |         |
| AB845e  |        |           |        |           | no      |         |         | G1903844A |           |           |           |         |         |         |
| AB845f  |        |           |        |           | no      |         |         | G1903797A |           |           |           |         |         |         |
| AB845g  |        |           |        |           | no      |         |         | G1903844A |           |           |           |         |         |         |
| AB845h  |        |           |        |           | no      |         |         | G1903844A |           |           |           |         |         |         |
| AB845i  |        |           |        |           | no      |         |         | G1903844A |           |           |           |         |         |         |
| AB845j  |        |           |        |           | no      |         |         | G1903844A |           |           |           |         |         |         |
| AB845k  |        |           |        |           | no      |         |         | A1903876T |           |           |           |         |         |         |
| AB845l  |        |           |        |           | no      |         |         | A1903876T |           |           |           |         |         |         |
| AB845m  |        |           |        |           | no      |         |         | A1903876T |           |           |           |         |         |         |
| AB845n  |        |           |        |           | no      |         |         | A1903876T |           |           |           |         |         |         |
| AB845p  |        |           |        |           | no      |         |         | A1903876T |           |           |           |         |         |         |
| AB845q  |        |           |        |           | no      |         |         | A1903876T |           |           |           |         |         |         |
| AB845r  |        |           |        |           | no      |         |         | no        |           |           |           |         |         |         |
| AB845s  |        |           |        |           | no      |         |         | A1903876T |           |           |           |         |         |         |
| AB980a  |        | no        |        |           | no      |         |         | G1903844A |           |           | no        |         |         |         |
| AB980b  |        | yes       |        |           | yes     |         |         | yes       |           |           | no        |         |         |         |
| AB980c  |        | no        |        |           | no      |         |         | G1903844A |           |           |           |         |         |         |
| AB980d  |        | yes       |        |           | yes     |         |         | yes       |           |           | no        |         |         |         |
| AB980e  |        |           |        |           | yes     |         |         | yes       |           |           | no        |         |         |         |
| AB980f  |        |           |        |           | yes     |         |         | yes       |           |           | no        |         |         |         |
| AB980g  |        |           |        |           | yes     |         |         | yes       |           |           | no        |         |         |         |
| AB980h  |        | yes       |        | no        | no      | yes     |         | yes       |           |           | no        | no      |         | yes     |
| AB980i  |        |           |        |           | yes     |         |         | yes       |           |           | no        |         |         |         |
| AB980k  |        |           |        |           | yes     |         |         | yes       |           |           | no        |         |         |         |
| AB1100a |        | yes       |        |           | no      | no      |         | yes       | no        |           | no        |         |         | yes     |
| AB1100b |        | yes       |        |           | no      | no      |         | yes       | no        |           | no        |         |         | yes     |
| AB1100c |        | yes       |        |           | yes     |         |         | yes       |           |           | no        |         |         |         |
| AB1100d |        | yes       |        |           | no      | no      |         | yes       | no        |           | no        |         |         | yes     |
| AB1100e |        | yes       |        |           | no      | ?       |         | yes       | no        |           |           |         |         | yes     |
| AB1100f |        | yes       |        |           | yes     |         |         | yes       |           |           | no        |         |         |         |
| AB1100g |        | yes       |        |           | no      | no      |         | yes       | no        |           | no        |         |         | yes     |
| AB1100h |        | yes       |        | no        | no      | yes     |         | yes       |           |           | no        | no      |         |         |
| AB1100i |        | yes       |        |           | no      | no      |         | yes       | no        |           | no        |         |         | yes     |
| AB1100k |        | yes       |        |           | yes     |         |         | yes       |           |           | no        |         |         |         |
| AB1900a | no     | yes       | no     |           | yes     |         | yes     | yes       |           |           | no        |         |         |         |
| AB1900b | no     |           |        |           | yes     |         |         | yes       |           |           | no        |         |         |         |
| AB1900c | no     | yes       |        |           | no      | no      | yes     | yes       | no        |           | no        |         |         | yes     |
| AB1900d | no     | yes       |        |           | no      | no      |         | yes       | no        |           | no        |         |         | yes     |
| AB1900e | no     |           |        |           | yes     |         |         | yes       |           |           | no        |         |         |         |
| AB1900f | no     |           |        |           | yes     |         |         | yes       |           |           | no        |         |         |         |
| AB1900g | no     |           |        |           | yes     |         |         | yes       |           |           | yes       |         |         |         |
| AB1900h | no     |           |        |           | yes     |         |         | yes       |           |           | no        |         |         |         |
| AB1900i | no     |           |        |           | yes     |         |         | yes       |           |           | yes       |         |         |         |
| AB1900j | no     |           |        |           | yes     |         |         | yes       |           |           | yes       |         |         |         |
| AB2300a | no     | yes       | no     |           | no      | no      |         |           | no        |           | yes       |         |         | yes     |
| AB2300b | no     | yes       | no     |           | no      | no      |         |           | no        |           | no        |         |         | yes     |
| AB2300c | yes    | yes       |        |           | no      | no      |         |           | no        |           | yes       |         |         | yes     |
| AB2300d | no     | yes       |        |           | no      | no      |         |           | no        |           | no        |         |         | yes     |
| AB2300e | no     |           |        |           | yes     |         |         |           |           |           | yes       |         |         |         |
| AB2300f | no     | yes       |        |           | no      | no      |         |           | no        |           | no        |         |         | yes     |
| AB2300g | yes    | yes       |        |           | no      | no      |         |           | no        |           | no        |         |         | yes     |
| AB2300h | yes    |           |        |           | yes     |         |         |           |           |           | no        |         |         |         |
| AB2300i | no     |           |        |           | yes     |         |         |           |           |           | yes       |         |         |         |
| AB2300k | no     | yes       |        |           | no      | no      |         |           | no        |           | yes       |         |         | yes     |
| AB2800a | yes    | yes       | yes    |           | yes     | no      | yes     | yes       |           | yes       |           | no      | yes     | yes     |
| AB2800b | no     |           | no     | yes       | no      | yes     |         | yes       |           | yes       |           | yes     | yes     | yes     |
| AB2800c | no     | yes       | no     | yes       | no      | yes     |         |           |           |           | yes       | yes     |         | yes     |
| AB2800d | yes    |           | yes    |           | yes     |         |         |           |           |           | yes       |         |         |         |
| AB2800e | yes    |           | no     |           | yes     |         |         |           |           |           | no        |         |         |         |

### 3. Transformation rates measured within and out reactors

A genomic DNA containing a resistance to kanamycin (gDNAkan<sup>R</sup>) was used in competence assays. gDNAkan<sup>R</sup> was obtained by transforming wild type bacteria with a cassette containing the resistance to kanamycin (see below). Genomic DNA was extracted from resistant cells by ethanol precipitation after lysis and separation with chloroform.

Competence was tested with a 20 days evolved bacteria during a control experiment. Four different conditions were tested: within the chemostat (air bubbles aeration + glass wall), in 50ml Falcon with air input tube (air bubbles aeration + plastic wall), in glass tube in shaker (aeration by shaking + glass wall) and in 2ml eppendorf microtubes (aeration by shaking + plastic wall).

For the three last conditions, the bacteria subjected to transformation were sampled from the chemostat. In each case, transformation assay was performed in selection medium supplemented with gDNAkan<sup>R</sup> 1 µg/ml and 20 mM KNO<sub>3</sub> pulse enhancing transformation rate. Bacteria were incubated at 30°C for 4.5 h. Samples were plated at different dilutions on LB supplemented with 50 µg/ml kanamycin, and incubated at 30°C overnight. The OD measured before plating allowed to estimate the number of plated cells. The rate of transformation was estimated by the ratio between the number of resistant colonies and the number of plated cells.

In chemostat and in Falcon supplied with air by an input tube, the competence was not detectable (below 10<sup>-9</sup>). Transformation only took place in condition of aeration by shaking (glass tube and eppendorf microtube), suggesting that air bubbles limits the transformation process.

Protocols used to obtain bacteria resistant to kanamycin: A cassette containing kanamycin resistance was first produced as follows: the gene conferring resistance to kanamycin (kan) was amplified by PCR from the plasmid pUC4K (GE Healthcare), and two fragments (named here H1 and H2) overlapping the extremities of the mutS gene were PCR-amplified with the *Acinetobacter baylyi* genome as template. Primers were designed to introduce sequences allowing subsequent hybridization of the fragments for the later cassette assembly (the sequences added for hybridization are underlined): tttttgatgatgcacgaaaagcggcaaac (left primer H1), cgcgggcggccggttcttaagtcacgtggtc (right primer H1), gcgggcccggccttgaaattggctacaatc (left primer H2), tttgtgcttccttgatcacgcttgacggt (right primer H2), cggccgcccgcttgcgggaagatgcgtga (left primer kan), ggccgggcccgcttgggaaagccacgttgt (right primer kan). Each fragment were about 1 kb long. One extremity of each fragment (H1, H2), and the two extremities of the kan fragment were partially digested on the 3' end via the partial exonuclease action of the T4 polymerase in the presence of a limited set of dNTP's: the fragments were each treated via 0.5 µl T4 DNA polymerase, DTT 2.5 mM, dATP 2.5 mM, 10 µl PCR product in 20 µl buffer T4 DNA polymerase during 30 min at 22°C. In such condition, the T4 polymerases chews away the 3' ends unless it encounters an A. The polymerase was then inactivated by a 20 min incubation at 75°C. The fragments with neo-formed cohesive protruding single-stranded ends were then hybridized by incubating 6µl H1, 6 µl H2 and 2 µl kan during 3 hours at 45°C, and ligated overnight at 4°C (0.5 µl T4 DNA ligase, 14 µl hybridized mix in 20 µl ligase buffer). The ligase was inactivated by a 10 min incubation at 65°C. The ligation of the three fragments was confirmed by gel electrophoresis. The cassette was then amplified by PCR with the pfu DNA polymerase (Fermentas).

ABwt was transformed as follows: 20 µl saturated culture of bacteria were incubated with 300 µl LB 2.5 h at 30°C with shaking; 95 µl PCR products were added and incubated with shaking 2 h at 30°C; cells were selected on LB plate supplemented with 50 µg/ml kanamycin. A few clones were isolated and the presence of the cassette in the genome was verified by PCR.

### 4. Calibration and measurements of nitrate concentration in chemostat

In order to estimate the concentration of nitrate within the reactor during the experiment, samples

were collected from the output of the reactor, centrifuged to remove bacteria and snap-frozen. For measurements, samples were thawed and the nitrate was reduced to nitrite; samples underwent then a Griess test. In detail, the Griess Reaction Nitrate Kit from World Precision Instrument was used: the reduction of nitrate to nitrite is obtained by a reaction using metallic particles of Cadmium; a Griess test follows, which results in a red pink color (540 nm) which level is related to the nitrite concentration. Spectral measurements were done at 600 nm using a photometer (Biophotometer, Eppendorf). Phosphate was found to inhibit the reduction of nitrate. We circumvented this effect by first precipitating Phosphate via the addition of 15%  $\text{CaCl}_2$  1 M, and with 10% NaOH 1 M to samples. Samples were then centrifuged one minute in micro-centrifuge at 13000 RPM, the supernatant was recovered and underwent a reduction by cadmium as described in the Nitralyzer kit protocol (World Precision Instrument).

Standards containing minimal medium with different concentration of nitrate were used to calibrate measurements (figure S1). The data were well fitted by polynomial function. Each sample was duplicated and the polynomial fit was used to estimate nitrate concentration in samples. The minimal level of detectable nitrate was estimated to be  $\sim 2 \mu\text{M}$  nitrate.

In an effort to accurately measure a saturation constant, we started another chemostat experiment under the same conditions of the above evolution experiments but with the clone of AB85a for initial seeding. The reactor flow-out was sampled for different dilution rates, the bacteria were eliminated by centrifugation and the sample were snap-frozen and stored for subsequent analysis. This experiment was led during less than 25 generations to limit the evolution of the strain. At four dilution rates (0.19, 0.50, 0.54 and  $0.60 \text{ h}^{-1}$ ), no nitrate was detectable with our experimental procedure. For  $D=0.70 \text{ h}^{-1}$  a value of  $82 \pm 2 \mu\text{M}$  nitrate was measured.

The same type of experiment has been made with the clone of AB215b, during about 55 generations. For  $D=0.60 \text{ h}^{-1}$  and  $D=0.78 \text{ h}^{-1}$ , no nitrate was detectable in the flow-out of the reactor, and for  $D=0.88 \text{ h}^{-1}$ , we measured a concentration of  $82 \pm 1 \mu\text{M}$ . However, the chemostat was possibly out of equilibrium for this latter value of  $D$  because the draining threshold has been estimated to be about 0.85 in this period. It can be deduced from the very low nitrate ( $< 2 \mu\text{M}$ ) in the reactor in a wide range of dilution rate that  $> 99.8\%$  of this nitrate present in the fresh medium (1mM) is captured by the bacteria.

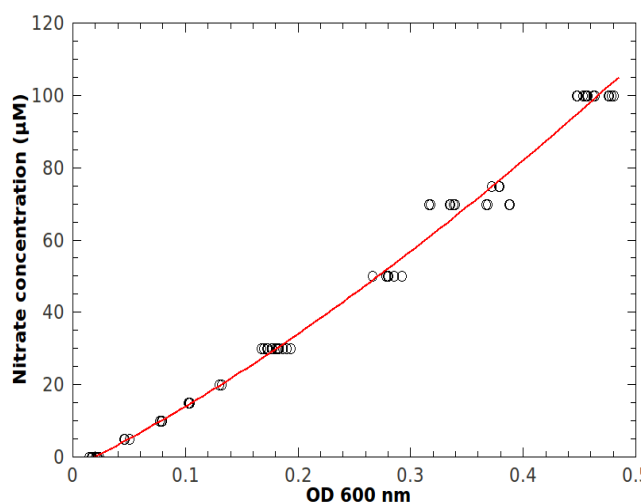

**Figure S1:** calibration; each point corresponds to a standard sample undergoing the Griess protocol and measured by spectroscopy at 600 nm.

## 5. Biolog assay

The comparative catabolic activities of the starting strain ABWT and of both endpoint clones AB2800a and AB2800b were determined by the Phenotype MicroArray Services of Biolog, Hayward, CA. The strains were tested on different carbon sources, nitrogen sources, phosphorus

and sulphur sources, nutrient supplements, and peptides nitrogen sources. We also compared the catabolic activities of clones AB1100h and AB2800b

(a)

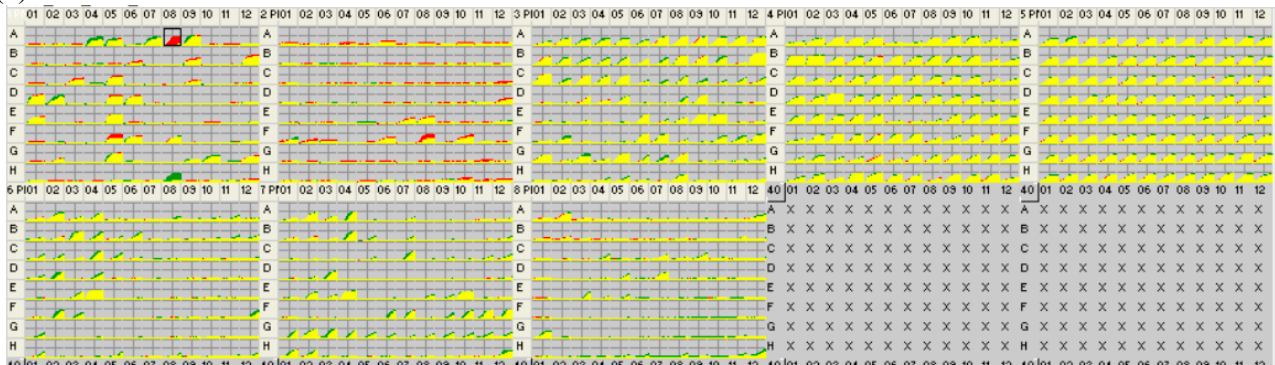

(b)

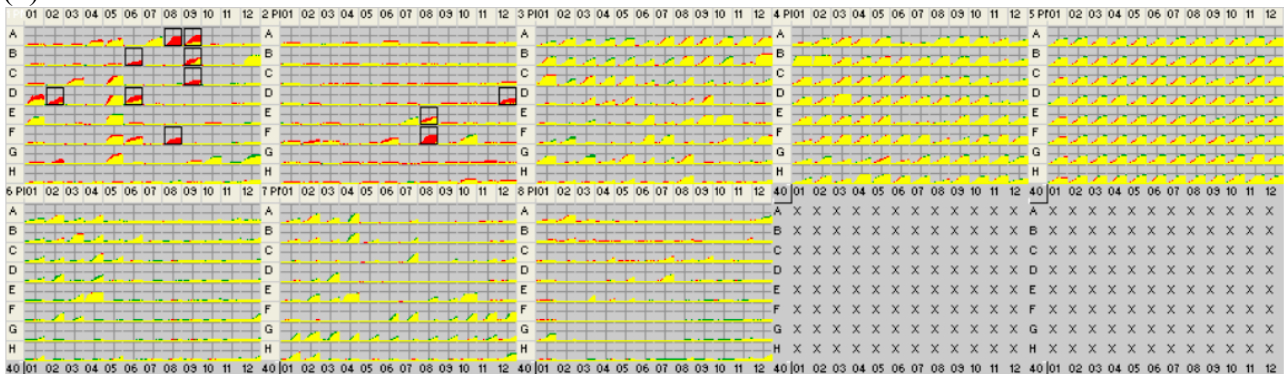

(c)

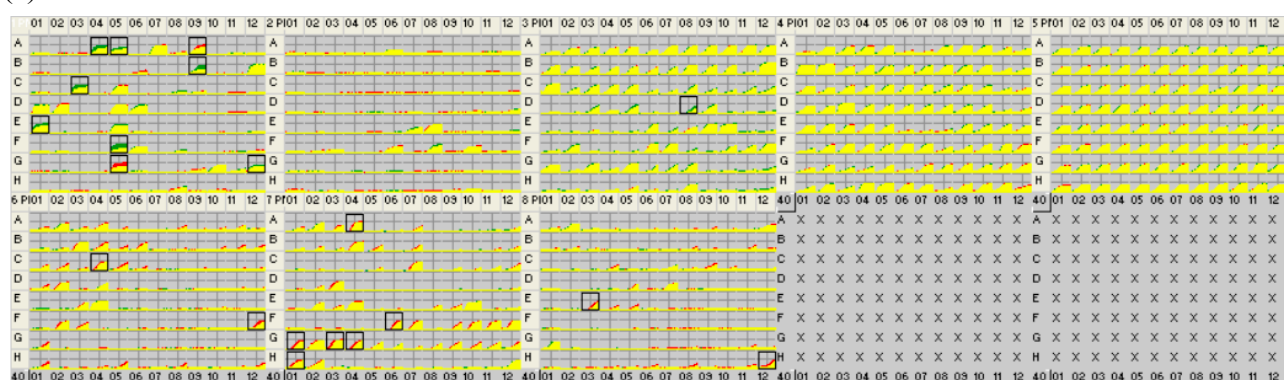

**Figure S2:** Each plate corresponds to a type of nutrient source tested; each square on a plate corresponds to a different nutrient. Top, from left to right: the two first plates test Carbon sources, the following plates test Nitrogen sources, Phosphorus and Sulfur sources, Nutrients supplements. Bottom: the three plates test Peptide Nitrogen sources.

(a) AB2800b was compared to ABwt. When there are similar phenotypic responses in both cell lines the kinetic curve is yellow, different phenotypic responses are expressed respectively in red for ABwt and green for AB2800b. The relevant differences are black squared by Biolog. For more details, please visit the web site of Biolog (<http://www.biolog.com/index.shtml>).

(b) AB2800a (green) was compared to ABwt (red)

(c) AB2800b (green) was compared to AB1100h (red)
